# Supplementary material for: Molecular Characterization and Phylogenetic Analysis of Flightin Gene in Vespa basalis (Hymenoptera, Vespidae)
Source: MDPI journal article supplement (doi:10.3390/ani14060978), 2024-03-21
Supplement: s1 [file s1]

**Table S1. Accession No**

| <b>Family</b>   | <b>Species</b>                                    | <b>Gene Bank IDs</b> |
|-----------------|---------------------------------------------------|----------------------|
| <b>Vespidae</b> | <i>Vespa mandarinia</i>                           | XP_035737952.1       |
|                 | <i>Vespa crabro</i>                               | XP_046824901.1       |
|                 | <i>Vespa velutina</i>                             | XP_047357593.1       |
|                 | <i>Vespula vulgaris</i>                           | XP_050858048.1       |
|                 | <i>Vespula pensylvanica</i>                       | XP_043673380.1       |
|                 | <i>Polistes dominula</i>                          | XP_015177827.1       |
|                 | <i>Polistes fuscatus</i>                          | XP_043495209.1       |
| <b>Apidae</b>   | <i>Bombus vancouverensis</i><br><i>nearcticus</i> | XP_033205116.1       |
|                 | subgenus <i>Bombus huntii</i>                     | XP_050473413.1       |
|                 | <i>Bombus impatiens</i>                           | XP_003491527.1       |
|                 | <i>Bombus terrestris</i>                          | XP_003394698.1       |
|                 | <i>Bombus ignitus</i>                             | 8EW5_A Chain A       |
|                 | <i>Apis dorsata</i>                               | XP_006618153.1       |
|                 | <i>Apis florea</i>                                | XP_003696584.1       |
|                 | <i>Apis laboriosa</i>                             | XP_043792750.1       |
|                 | <i>Apis mellifera caucasica</i>                   | KAG6799352.1         |
|                 | <i>Apis cerana</i>                                | XP_016912210.1       |
|                 | <i>Megachile rotundata</i>                        | XP_003706340.1       |
|                 | <i>Melipona quadrifasciata</i>                    | KOX67587.1           |

|                   |                                  |                |
|-------------------|----------------------------------|----------------|
|                   | <i>Frieseomel ittavaria</i>      | XP_043521843.1 |
|                   | <i>Habropoda laboriosa</i>       | XP_017790128.1 |
|                   | <i>Colletes gigas</i>            | XP_043257386.1 |
|                   | <i>Osmia lignaria</i>            | XP_034180962.1 |
|                   | <i>Ceratina calcarata</i>        | XP_017884125.1 |
| <b>Formicidae</b> | <i>Camponotus floridanus</i>     | XP_011267943.1 |
|                   | <i>Monomorium pharaonis</i>      | XP_012533138.1 |
|                   | <i>Pogonomyrmex barbatus</i>     | XP_011629524.1 |
|                   | <i>Dinoponera quadriceps</i>     | XP_014479977.1 |
|                   | <i>Harpegnathos saltator</i>     | XP_011154535.1 |
|                   | <i>Odontomachus brunneus</i>     | XP_032685464.1 |
|                   | <i>Acromyrmex echinator</i>      | XP_011064338.1 |
|                   | <i>Pseudomyrmex gracilis</i>     | XP_020284828.1 |
|                   | <i>Cataglyphis hispanica</i>     | XP_050455871.1 |
|                   | <i>Formica exsecta</i>           | XP_029672853.1 |
|                   | <i>Nylanderia fulva</i>          | XP_029155503.1 |
|                   | <i>Solenopsis invicta</i>        | XP_011171429.1 |
|                   | <i>Temnothorax longispinosus</i> | TG Z32040.1    |

```

M-WD-D-EPAPWDIE-ETAP-EE-TGDQEG--A-KEG-G---AEGAA--PGELPKVKLEKI
M-WD-D-EPAPWDIE-ETAP-EE-TGDQEG--A-KEG-G---AEGGA--PGELPKVKLEKI
M-WD-D-EPAPWDIE-ETAP-EE-TGDQEG--A-KEG-G---AEGVA--PGELPKVKLEKI
M-WD-D-EPAPWDIE-ETVP-EE-TGEQEG-A-KEG-G---AEVVA--PGELPKVKLEKI
M-WD-D-EPAPWDL D-EPAA-EE-TQEAGQ-A-PEG-A--AEGAE--PGELPKVKLEKI
M-WD-D-EPAPWDL D-EPAA-EE-TQAQEG-A-PEG-A--AEGAE--PGELPKVKLEKI
M-WD-D-EPAPWEEF-ETPA-EQ-PA-EG-AEGAEG-AP-AE-GE-AAEKPKIKLLKL
M-WE-D-DTSAWEFE-ETPA-EE-TA-EG-AEGAAA--AE-GE-AAEKPKIKLEKI
M-WAD-E-EPAPWDIE-ETPA-EQ-AP-EA-S-AES-AA-P-AAEAA--TGEKPKIKLEKI
M-WAD-E-EPAPWDVE-ETPA-EQ-AP-EA-S-AES-AA-P-AAEAA--TGEKPKIKLEKI
M-WAD-E-EPAPWDVE-ETPA-EQ-AP-EA-S-AES-AA-P-AAEAA--TGEKPKIKLEKI
M-WAD-E-EAAPWDIE-ETPA-EE-TP-EA-S-AET-AA-P-AGEAA--TGEKPKIKLEKI
M-WAD-E-EPAPWDIE-ETPA-EQ-AP-EA-S-AES-AA-P-AAEAA--TGEKPKIKLEKI
M-WAD-E-EPAPWDIE-ETPE-EQ-PA---A-AEG-AP-A-AEAAA--PGEKPKIKLEKI
M-WAD-D-EPAPWDIE-ETPE-EQ-PA-EGE-A-AEG-AP-A-EGAAA--PGEKPKIKLEKI
M-WAD-E-EPAPWDIE-ETPE-EE-PE-EA-A-AEG-AP-A-AEAPA--PGEKPKIKLEKI
M-WAD-E-EPAPWDIE-ETPE-EQ-PE-EA-P-AEG-AA-A-AEAAA--PGEKPKIKLEKI
M-WAD-E-EPAPWDIE-ETPE-EQ-PE-EA-P-AEG-AP-A-AEAAA--PGEKPKIKLEKI
M-WD-D-EPAPWDL D-ETPA-EE-PA-EG-A-AEG-GTEGG-EGAAA--PAEKPKIVLQKI
M-WD-D-EPAPWDIE-ETPE-EQ-PA-EGEAAA-AEG---G-A-AAA--PAELPKVKLEKI
M-WD-D-EPAPWDVD-ETPA-EQ-PE-EG-A-AEG-AEAGGGGAAAA--PAEKPKIVLKL
M-WAD-D-EPAPWDIE-ETPE-EQ-PG-EAA-A-AEG-AP-A-EGAAA--PGEKPKIKLEKI
M-WADED-EPAPWDIE-ETPE-EQ-PA-DD-AP-AEG-AA-P-AAAAA--PGEKPKIKLEKI
M-WD-D-EPAPWDIE-DTPA-EE-TA-EG-A-AEG-AEAGA-APAAA--PGEKPKIKLEKI
M-WD-D-EPAPWDIGDTPA-DQ-PA-EGEA-A-AEG-AP-A-EGAAAKDAAEKPKITLLKL
M-WD-D-EPAPWDIE-EPQP-A-A--A-EG-T-TEG-AP-AE-GA-APETPVLKLEKL
MSWN-EEEEAPWDSE-EPAP-EA-SA-EG--AEG-AP-AQ-PA-ATERPVLKLEKL
M-WE-D-EPAPWDIE-EPAP-EA-GA-EG-A-TEG-AA-TE-AA-ATEKPVLLKLLKL
M-WE-D-EPAPWDIE-APAP-EGATA-EG-T-AEG-AP-VE-GA-ASEQVLKLEKI
M-WN-D-ESAPWDIE-EPPT-EA-AV-EG-A-AEG-AP-AE-GA-APEKPAKLEKI
M-WT-DEESAPWDIE-EPAP-EA-GA-EG-A-TEG-AP-VE-GAA-AAEKPVLLKLLKL
M-WD-D-EPAPWDIE-ETAP-DA-AV-EG-A-AEG-AP-AE-GA-APEKPVLLKLEKI
M-WN-D-EPASWDIE-EPAP-AA-TT-EG-A-AEG-AP-AE-GA-APERPVLKLEKI
M-WD-D-EPASWDIE-EPAA-A-TE-GA-T-AEGEAP-AE-GA-VSDKPVLLKLEKL
M-WD-D-EPAAWTDIE-ETAP-EA-AA-EG-A-AEG-AP-AE-GA-APEKPVKLEKI
M-WD-D-EPAPWDVQ-EEAPPEAA-AA-EG-A-AEG-AP-AEGA-APEKPRITLLKL
M-WD-D-EPAPWDAAE-EPAP-A-AA-DG-A-AEG-AP-AEGAP-ATEKPVLLKLLKL
MSWA-DDEEAPWDIE-EPAA-EA-VA-EG-A-GEG-AP-AE-AA-TDREVLKLLKL

```

```

* * * * *
EPFKYNHHWVRPLFLNYD - YLYDYRKNYYDDVIDYLDQRQKGLYREPPRAQEWAEARTMRTYDQKNL
EPFKYNHHWVRPLFLNYD - YLYDYRKNYYDDVIDYLDQRQKGLYREPPRAQEWAEARTMRTYDQKNL
EPFKYNHHWVRPLFLNYD - YLYDYRKNYYDDVIDYLDQRQKGLYREPPRAQEWAEARMTYDQKNL
EPFKYNHHWVRPLFLNYA - YLYDYRKNYYDDVIDYLDQRQKGLYREPPRAQEWAEARMTYDQKNI
EPFKYNHHWVRPLFLNYA - YLYDYRKNYYDDVIDYLDQRQKGLYREPPRAQEWAEARMTYDQKNL
EPFKYNHHWVRPLFLNYD - YLYDYRQNYNDVIDYLNQRAGLFRFPRAQEWAEARALMYDAKNI
EPFKYNHHWVRPLFLNYD - YLYDYRQNYNDVIDYLNQRAGLFRFPRAQEWAEARALMYDTKNI
EPFHYNNHHWVRPLFLNYA - YLYEYRKNYYNDVIDYLNQREKGIFFREPPRAQEWAEARMTYDEKNT
EPFHYNNHHWVRPLFLNYA - YLYEYRKNYYNDVIDYLNQREKGIFFREPPRAQEWAEARMTYDEKNT
EPFHYNNHHWVRPLFLNYA - YLYEYRKNYYNDVIDYLNQREKGIFFREPPRAQEWAEARMTYDEKNT
EPFHYNNHHWVRPLFLNYA - YLYEYRKNYYNDVIDYLNQREKGIFFREPPRAQEWAEARMTYDEKNT
EPFHYNNHHWVRPLFLNYA - YLYEYRKNYYDDVINYLNRQKGLFREPPRAQEWAEARMTYDEKNL
EPFHYNNHHWVRPLFLNYA - YLYEYRKNYYDDVINYLNRQKGLFREPPRAQEWAEARMTYDEKNV
EPFHYNNHHWVRPLFLNYA - YLYEYRKNYYDDVINYLNRQKGLFREPPRAQEWAEARMTYDEKNV
EPFHYNNHHWVRPLFLNYA - YLYEYRKNYYDDVINYLNRQKGLFREPPRAQEWAEARMTYDEKNV
DPFHYNNHHWVRPLFLNYD - YLYEYRKNYYDDVIDYLNQRQKGIYREPPRAQEWAEARMTYDQKNT
EPFHYNNHHWVRPLFLNYA - YLYEYRKNYYDDVIDYLNQRQKGIFFREPPRAQEWAEARMTYDEKNT
EPFHYNNHHWVRPLFLNYD - YLYEYRKNYYDDVIDYLNQRQKGIFFREPPRAQEWAEARMTYDQKNT
DPFHYNNHHWVRPLFLNYA - YLYEYRKNYYDDVIDYLNQRQKGLFREPPRAQEWAEARMTYDMKNT
EPFHYNNHHWVRPLFLNYA - YLYDYRKNYYDDVIDYLNQRQKGIFFREPPRAQEWAEARMTYDEKNT
EPFHYNNHHWVRPLFLNYD - YLYEYRKNYYDDVIDYLNQRQKGIFFREPPRAQEWAEARMTYDEKNT
EPFHYNNHHWVRPLFLNYA - YLYDYRQNYNDVIDYLNQRQKGLFREPPRAQEWAEARMTYDQKNI
EPFHYNNHHWVRPLFLNYD - YLYDYRKNYYDDVIDYLNQRQKGLFREPPRAQEWAEARVLTRTYDQKNL
EPFHYNNHHWVRPLFLNYA - YLYDYRKNYYDDVIDYLDRSQKGIFFREPPRAQEWAEARTMRTYDQKNV
EPFHYNNHHWVRPLFLNYA - YLYDYRKNYYDDVIDYLDRSQKGIFFREPPRAQEWAEARLTRTYDQKNI
EPFHYNNHHWVRPLFLNYE - YLYDYRKNYYDDVIDYLNQRQKGYMREPPRAQEWAEARLTRTYDQKNM
EPFHYNNHHWVRPLFLNYA - YLYDYRQNYNDVIDYLNQRQKGIYREPPRAQEWAEARLTRTYDQKNE
EPFHYNNHHWVRPLFLNYA - YLYDYRKNYYDDVIDYLNRSQKGIYREPPRAQEWAEARLTRTYDQKNM
EPFHYNNHHWVRPLFLNYA - YLYDYRKNYYDDVIDYLNQRQKGIFFREPPRAQEWAEARTMRTYDQKNI
EPFHYNNHHWVRPLFLNYD - YLYDYRKNYYDDVIDYLNHRQKGLFREPPRAQEWAEARMTYDQKNT
EPFHYNNHHWVRPLFLNYA - YLYDYRKNYYDDVIDYLDRSQKGIYREPPRAQEWAEARMTYDEKNV
EPFHYNNHHWVRPLFLNYA - YLYDYRKNYYDDVIDYLDRSQKGIYREPPRAQEWAEARLTRTYDEKNT

```



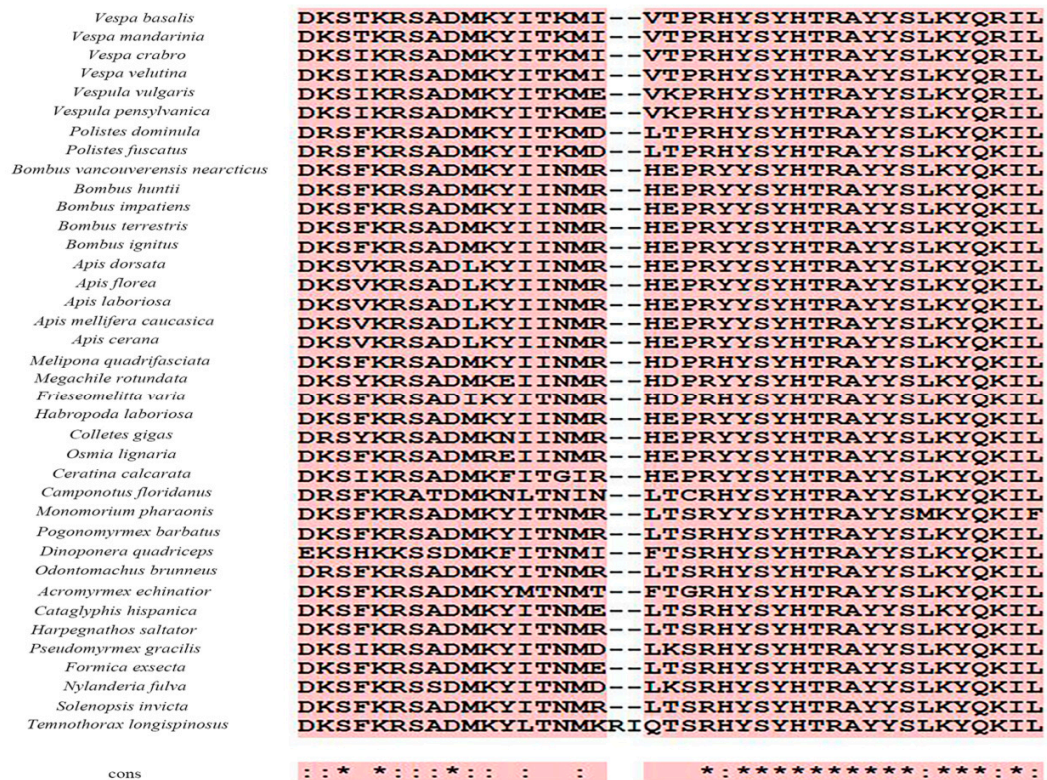

Figure S1. Protein Homology

Table S2. Primers details

| primer name                                             | Primer No | primer sequence 5-3          |
|---------------------------------------------------------|-----------|------------------------------|
| blue.fasta-1                                            |           |                              |
| RT1569-A-P1F                                            | P1        | CATTGCATCTGTTTGATATAAAAGAGC  |
| RT1569-A-P1R                                            |           | CTTTAGCGATTCTAACTTCGACACT    |
| RT1569-A-P2F                                            | P2        | GGGATACCTAACTACGTGCAGTTTC    |
| RT1569-A-P2R                                            |           | TCCATTTGATGCTTGCTTTATTC      |
| ul.fasta-1                                              |           |                              |
| RT1569-C-P1F                                            | P3        | ATCTTTTAAAAAGAACCATTGTTG     |
| RT1569-C-P1R                                            |           | GGTATCGGTTAAATAATCAAAAGAACAG |
| RT1569-C-P2F                                            | P4        | ATGGAAAAATTATCACGTGGTCAAGT   |
| RT1569-C-P2R                                            |           | TTATATGCCAGGAATTTACTTTATTGG  |
| Vespa velutina flightin (LOC124952177), mRNA(1).fasta-1 |           |                              |
| RT1569-D-2F                                             | P4        | ATAAAAGCAAGAAAGAAGGCAAGGT    |
| RT1569-D-2R                                             |           | TATCGGCGGATCTCTTAATACTCTT    |
| RT1569-D-P2F                                            | P5        | CGCCCATATTTCTCAATTATGACT     |
| RT1569-D-P2R                                            |           | TAAGTAAAAGTGCACGTGATTTTATAAT |

S5. full length of flightin

| identification number | sequence                                                                                                                                                                                                                                                                                                                                                                                                                                                                                                                                                                                                                                                                                                                                                                                                                                                                                                                                                                                                                                                                                                                                                                                                                                                                                                                                                                                                                                                                                                                                                                                                                                                                                                                                                                                                                                                                                                                                                                             |
|-----------------------|--------------------------------------------------------------------------------------------------------------------------------------------------------------------------------------------------------------------------------------------------------------------------------------------------------------------------------------------------------------------------------------------------------------------------------------------------------------------------------------------------------------------------------------------------------------------------------------------------------------------------------------------------------------------------------------------------------------------------------------------------------------------------------------------------------------------------------------------------------------------------------------------------------------------------------------------------------------------------------------------------------------------------------------------------------------------------------------------------------------------------------------------------------------------------------------------------------------------------------------------------------------------------------------------------------------------------------------------------------------------------------------------------------------------------------------------------------------------------------------------------------------------------------------------------------------------------------------------------------------------------------------------------------------------------------------------------------------------------------------------------------------------------------------------------------------------------------------------------------------------------------------------------------------------------------------------------------------------------------------|
| blue.fasta-1          | <p> CATTGCGATCTGTTTGATATAAAAGAGCTCACTAAGCTTTGGTACGGGTCAAGTGAGTTGCGGAACGTGCT<br/> GTCAACTTATCGACCGCTCTCACTTCAATTGAGATTGCAACGGACGTAGAAATAAGTAGAAGTTTA<br/> TTTTACATCTTAACTTGACATATCTATTCAAGGTCCTAAGGGTTGAAACCTTTTGGACGTGGATAGGACG<br/> AGTCAAGACGACCACTAAAACCTTCTCTCGTTGAGACATCTCGTTTATCTCGGAAGATCCATTTTAACGA<br/> TTCGTCAGTCTACCAACCGAGGACACAGCCTTGAAGAAGGATGCTGCTGCAAAACTATACCTTCGAGA<br/> ACGGCCCTCAGCCTTTTGTAGGCGGAATGGGAGAGGTCCAACAAATGCAAGAAAGATTTTGGGATG<br/> GAACGTACCAACCGGAACACATGGGACTCGTACACGTTTCATTGGAGGGGCTACCTAGCACCTGGAAAAAT<br/> ACTGGCACATTGGTCTCTCGCTTATTATTTTATGCTGTTTGTGTCATGTCGCTGTTGGAAATGGATGCGTC<br/> GTATGGATATTAGACATCAAAAGCTCTTAGGACACCCCTCGAACATGTTTATCGTCAATTTGGCTATATT<br/> CGATCTAACGATGGCGTTAGAAATTCACATTTTATAATAAATAGCTTTATACAACGCATTTGGGGTTGG<br/> GAGATTGGTTGTGCTATATTGCAATTTTGGGCAGTATTTCTGGTATCGGGCAGGCAATCTCCAACGTTG<br/> CCATTGCCTACGATCGTTACAGAACGATATCGTGCCGATCGATGGTAGACTAAACGGATCGCAAGCTG<br/> GATTGATCGTTGCATTTACTTGGTTCTGGGCTTTACCATTTTCAGTTTACCTCTTATAGAGGTATGGGG<br/> AAAATTTGTACCAGAGGGATACCTAATACATGCAGTTTCGATTTTCTAACGGATAACTCGGATACGAG<br/> GGTTTTCGTAGCTTCGATCTTTCTTTGGTCTTATCTTTACCATTGACCCTCATAGTTTATTTTACTCGCA<br/> ATTGATTAGATCCATTAGACAACACGAGAAGATGCTTCGCGATCAGGCAAAAAAATGAACGTGAAAT<br/> CTTTGGTTTCAAATCAGGATAAAGAACGTAGCGTCGAAGTAGAATCGCTAAAGTAGCGTTCACTATTT<br/> TCTTCTATTCTCTGCGCGTGGACGCCCTATGCTGTTGTGCGCTGTTATCGGTGCTTTTGGTAATAGCGA<br/> CTTGTGACACCTCACGTAGGTATGTTACCAGCAGTTTCGCAAAATCGGTTTCGTGCATAGATCCATGG<br/> ATTTATGCCATCAATCATCCAAGGTATCGTCAGGAATTACAAAAGCGATGCAAGTGGATGGGAATACGA<br/> GAACCCGAACCAAGTTGCAGACAATGTTTCAGCGCAGACTGAAAAACCTTAAGGCAGACGAAGCATAA<br/> TCTAAATGTTTATGTACTTTATGAAAAATGAAAAACGACGGCATGGATGATCGATCGTATCGAATCGT<br/> CAATCCACCACCGATTGACATCGATCTTTGTCTCGTCTACGATTTCTTTTATTGTCAATATATTATAAT<br/> AGAAATTATTACCAAAATATTCTGTATAAAATTTGTCGTTATTATTATTATTATTATTATTATTATTAT<br/> TCTTATTATTATTATTATCATTTATACAGTAGAACGTGGCACATACACGCTAATCTGTGGTTTCTTATATA<br/> AATTTGAATAAAGCAAGCATCAATGGA </p> |
| ul.fasta-1            | <p> ATCTTTTAAAAAAGAACCGATTGTGGATTAAATTTCTACTTTTGTTCATACAAAAATGGATACTAA<br/> AAATGGAACATAATCGACACAAAAAAGATACTATGAAAAAGTAGTCAACAGCAATGAAGATAAGA<br/> ATGTATACTATAATTGAAATCGATTGATTGACTTTGAAGTTTGCTCTTGCTGACCAACGGTAATCA<br/> AGGGATGATCCGTAGCTGATCCTCAAATGAAGCCATATCGTCGAGCTGATTAAGGTTTCATGGATT<br/> TATTTTGACAGATATGGTATAAAAGGCCACATCTTGGTTAATTAACAAAAACAGGTGAGGACTGGTA<br/> GACGGTGACCACCAACATGTTCAACGACAGTATTTCATTGGGAGGCGAGAGTTTACCAGCAGGTCC<br/> ACCACGCCTATTGGGATGGAACGTCCTGCCGAAGAATTGGTACATGTACCGGAACATTGGCTGGTC<br/> TTTCTGAACCAATCCCTCCCTCATTATATGCTGGCCCTGTTATATATATTATTCACATTCATTGCTT<br/> TACTTGGCAATGGTCTCGTCATATGGATATTTGCGCTGCCAAATCCTTGAGGACTCCCTCGAACATG<br/> TTCGTTGTGAATCTTGCGATTTGCGATTTTGCCATGATGATGAAGACACCAATTTTTATATACAATTCA<br/> TTTAACACCGGCTTTGCTTTGGGCAATCTGGCATGCCAGATTTTGTACGATTGGTTTCATTGCTGG<br/> CATTGGTGCAGCGGTAACATAATGCTGCGATAGCATATGATAGATACAGTACCATAGCCAGACCATTG<br/> GATGGAAAAATATCACGTGGTCAAGTGATTCTCTTTGTCGGATTAATTTGGGTTTACGTTTGGCTTG<br/> GGTATTAATGCCTGCAATGGGTGTTTGGGGTCGTTATGACTCGTAAGGATTCTTACAAGCTATTGCTT<br/> TTGATTTATTAACCGATACCGCTGAAACAAGATATTCGTTTAACTTATTTATTTCTCCTATTGTTT<br/> ACCAATGTCACTTATTGTATATTATTACAGTCAAAATGTTAGTCATGTTGTTAATCACGAAAAGGCTCT<br/> TCGAGAAACAAGCAAAGAAGATGAACGTTGAAAGTTTACGAAGTAACGCCAATCAGAATGCTCAATC<br/> TGCTGAAATTCGTATAGCGAAGGCTGCCATTACGATTTGTTTCTATTTGTTGCCGATGGACACCAT<br/> ACGCAGTACTTGCTATGATCGGTGCATTTGGAACAAGCGTTGCTTACTCCGGCGTTACTATGATC<br/> CCTGCATGCTTTTGCAAAAGTGTTGCTGTATTGATCCATATGTTTATGCGATCAGTCATCCAAAATA<br/> CAGACTCGAGTTGCAAAACGATTACCATGGTTAGAGCTTCAAGAGAAACCAATCGCATCCGACAGT<br/> GCAAGTACAACCTACCGAACTGTAAATACAGCACCACCAGCTTCGAGTTAATCTACTTCTACATTTGA<br/> CACAATAACGGATCGATGATAAAAAAATGAAAAAGTACGCTCGTAATACTCCGATTGTATGAT<br/> TGCCTTCACTGTAACCTCAAAATATGTGATTATATTCTGTATAGTAAATGACATTCCAATAAAGTAAAT<br/> TCCTGGCATATAA </p>                                                                                                                                               |

|                                                                                                              |                                                                                                                                                                                                                                                                                                                                                                                                                                                                                                                                                                                                                                                                                                                                                                                                                                                                                                                                                                                                                                                                                                                                                                                                                                                                                                        |
|--------------------------------------------------------------------------------------------------------------|--------------------------------------------------------------------------------------------------------------------------------------------------------------------------------------------------------------------------------------------------------------------------------------------------------------------------------------------------------------------------------------------------------------------------------------------------------------------------------------------------------------------------------------------------------------------------------------------------------------------------------------------------------------------------------------------------------------------------------------------------------------------------------------------------------------------------------------------------------------------------------------------------------------------------------------------------------------------------------------------------------------------------------------------------------------------------------------------------------------------------------------------------------------------------------------------------------------------------------------------------------------------------------------------------------|
| <b>Vespa velutina flightin<br/>(LOC124952177),<br/>mRNA(1).fasta-1<br/>partial experimental<br/>sequence</b> | ATAAAAGCAAGAAAGAAGGCAAGGTCCCCGCGAGTGCGGAAGCTTCAAAGACGAGAGGGTAGTTT<br>TTTTTGCAGTCTGTATAGGTGCTTCGTAGAGCGAGCATCGTAGCAAAGGCTTTCTAAAGAGAATTGA<br>AGAAAAAGAAGAAGAAGTAAAAGAAGGATGTGGGACGATGAACCAGCTCCGTGGGATATCGAAG<br>AAACGGCTCCCGAAGAAACAGGAGACCAAGAAGGAGCCAAGGAAGGGGGAGCTGAAGGGGCTGC<br>ACCCGGTGAACACCAAAAGTAAAGCTCGAAAAGATCGAACCTCCAAAGTACAATCATCATTGGGTG<br>CGCCCATTTTCTCAATTATGACTATCTTTACGATTACAGGAAGAATTATTACGACGACGTAATCGA<br>CTATCTCGATCAAAGACAAAAGGGTTTGTATCGTGAGCCTCCAAGAGCACAGGAATGGGCAGAAAG<br>GACCATGAGGACGTACGATCAGAAGAACCTTGATAAGAGTACTAAGAGATCCGCCGATATGAAATA<br>CATCACTAAAATGATAGTTACGCCAAGACATTATAGCTATCATACGCGGGCATATTATAGCTTGAAGT<br>ACCAGAGAATTCTTTGAGTTATCATTTTTGATGGAGAATGATCGGCGAAGATTGACGATTAAAGATC<br>TTACACTATTCTTCGTCGATATTGCTATTACCGATAATGCCAGTGGAATCCTTTTTTAATCGGCTTA<br>CCTATACGTTGTATATAACATCATCTTAGACATGAGGATGTTGTATTTAAAAATAAATCGTAGTCGT<br>CGTAGATATTTATTCTGGATCTTTCATTAACGAGGGAAAAGATCACGGTTTACCTCTGGCCAAATTT<br>ATTTATCGAGTAGCACTTATCGTCTAATGTATCGATAATTTCAATTTCTAGATAAATTCGATTTCGATTTC<br>ATACGCGATTCAATTTATCTTCGTAGATATATTTTTTCATAAATAGGGACAAACATTGCGATAGAATT<br>CGATATCTTATCCCATCAACAAATCAATCGTCATAAATTTAAACGCGTACTCGTTTTATTGTTTCGTTT<br>GATTATTTATTTGTCATCAATTTTATGATATAGCTATGACGTGCTTATGTACTATGCCTATTGTATATG<br>TATTACTGTTATAAATCGGTATTATAAAATACACGTGCACCTTTACTTA |
|--------------------------------------------------------------------------------------------------------------|--------------------------------------------------------------------------------------------------------------------------------------------------------------------------------------------------------------------------------------------------------------------------------------------------------------------------------------------------------------------------------------------------------------------------------------------------------------------------------------------------------------------------------------------------------------------------------------------------------------------------------------------------------------------------------------------------------------------------------------------------------------------------------------------------------------------------------------------------------------------------------------------------------------------------------------------------------------------------------------------------------------------------------------------------------------------------------------------------------------------------------------------------------------------------------------------------------------------------------------------------------------------------------------------------------|
